# Supplementary material
Source: HighWire-hosted journal article supplement (https://www.cmajopen.ca/highwire/filestream/85279/field_highwire_adjunct_files/1/2019-0225-2-at.pdf)
Supplement: 2019-0225-2-at.pdf [file 2019-0225-2-at.pdf]

## **Appendix 2: Members of the Alberta Seniors' Health Research PSP Steering Group:**

**Fran Jamison**, Patient Member, Volunteer

**Sandy McMeekin**, Patient Member, Volunteer

**Pat Fonstad**, Caregiver Member, Volunteer

**Lisa Poole**, Caregiver Member, Volunteer

**Leslie Saunders**, Caregiver Member, Volunteer

**Katie Churchill**, Clinician Member, Senior Practice Lead, Health Professions Strategy & Practice, Alberta Health Services

**Karen Leung**, Clinician Member, Physician, Glenrose Rehabilitation Hospital

**Suzanne Nichol**, Clinician Member, Clinical Nurse Specialist, Specialized Geriatrics Services, Alberta Health Services

**Jessica Spence**, Representative Member, Senior Patient Engagement Consultant, Strategic Clinical Networks, Alberta Health Services

**Nicole Smith**, Representative Member, Director of Research and Community Engagement, Sage Seniors Association

**Navjot Virk**, Representative Member, Research and Innovative Practice Manager, The Brenda Strafford Foundation

**Katherine Cowan**, JLA Advisor, James Lind Alliance

**Billy Zhao**, PSP Coordinator, Research Assistant, Seniors Health Strategic Clinical Network™, Alberta Health Services

**Dr. Heather Hanson**, PSP Lead and Chair, Assistant Scientific Director, Seniors Health Strategic Clinical Network™, Alberta Health Services

**Dr. Adrian Wagg**, PSP Lead and PI, Scientific Director, Seniors Health Strategic Clinical Network™, Alberta Health Services
